# Supplementary material for: Clinical Outcomes of Third-Generation Cephalosporin Definitive Therapy for Bloodstream Infections Due to Enterobacterales with Potential AmpC Induction: A Single-Center Retrospective Study
Source: MDPI journal article supplement (doi:10.3390/pathogens12091152), 2023-09-11
Supplement: s1 [file s1]

Supplementary Table S1 - Comparison of comorbidities between ICD-9 and ICD-10

| Item                                  | Score | ICD-9 <sup>1</sup><br>N=86 | ICD-10 <sup>1</sup><br>N=267 | p-value           |
|---------------------------------------|-------|----------------------------|------------------------------|-------------------|
| Myocardial infarction                 | 1     | 10 (11.6)                  | 49 (18.4)                    | 0.15              |
| Congestive heart failure              | 1     | 26 (30.2)                  | 62 (23.2)                    | 0.19              |
| Peripheral vascular disease           | 1     | 16 (18.6)                  | 59 (22.1)                    | 0.49              |
| Cerebrovascular disease               | 1     | 14 (16.3)                  | 62 (23.2)                    | 0.17              |
| Dementia                              | 1     | 3 (3.5)                    | 13 (4.9)                     | 0.77 <sup>3</sup> |
| Chronic pulmonary disease             | 1     | 32 (37.2)                  | 82 (30.7)                    | 0.26              |
| Rheumatic disease                     | 1     | 2 (2.3)                    | 9 (3.4)                      | 1.00 <sup>3</sup> |
| Peptic ulcer disease                  | 1     | 7 (8.1)                    | 25 (9.4)                     | 0.73              |
| Mild liver disease                    | 1     | 12 (14.0)                  | 35 (13.1)                    | 0.84              |
| Diabetes without chronic complication | 1     | 16 (18.6)                  | 50 (18.7)                    | 0.98              |
| Diabetes with chronic complication    | 2     | 5 (5.8)                    | 31 (11.6)                    | 0.12              |
| Hemiplegia or paraplegia              | 2     | 10 (11.6)                  | 42 (15.7)                    | 0.35              |
| Renal disease                         | 2     | 20 (23.3)                  | 75 (28.1)                    | 0.38              |
| Any malignancy <sup>2</sup>           | 2     | 26 (30.2)                  | 87 (32.6)                    | 0.68              |
| Moderate or severe liver disease      | 3     | 3 (3.5)                    | 22 (8.2)                     | 0.14              |
| Metastatic solid tumor                | 3     | 18 (20.9)                  | 47 (17.6)                    | 0.49              |
| AIDS/HIV                              | 6     | 0 (0.0)                    | 2 (0.7)                      | 1.00 <sup>3</sup> |

<sup>1</sup> Data reported as n (%)

<sup>2</sup> Including lymphoma and leukemia, except malignant neoplasm of skin

<sup>3</sup> Exact Fisher test

Supplementary Table S2 – Comparison of components of Charlson comorbidity index between therapy groups.

| Item                                  | Score | 3GC definitive therapy <sup>1</sup><br>N=129 | Non-3GC definitive therapy <sup>1</sup><br>N=224 | p-value <sup>2</sup> |
|---------------------------------------|-------|----------------------------------------------|--------------------------------------------------|----------------------|
| Myocardial infarction                 | 1     | 19 (14.7)                                    | 40 (17.9)                                        | 0.45                 |
| Congestive heart failure              | 1     | 41 (31.8)                                    | 47 (21.0)                                        | <b>0.024</b>         |
| Peripheral vascular disease           | 1     | 29 (22.5)                                    | 46 (20.5)                                        | 0.67                 |
| Cerebrovascular disease               | 1     | 31 (24.0)                                    | 45 (20.1)                                        | 0.39                 |
| Dementia                              | 1     | 7 (5.4)                                      | 9 (4.0)                                          | 0.54                 |
| Chronic pulmonary disease             | 1     | 47 (36.4)                                    | 67 (29.9)                                        | 0.21                 |
| Rheumatic disease                     | 1     | 3 (2.3)                                      | 8 (3.6)                                          | 0.75 <sup>3</sup>    |
| Peptic ulcer disease                  | 1     | 10 (7.8)                                     | 22 (9.8)                                         | 0.51                 |
| Mild liver disease                    | 1     | 17 (13.2)                                    | 30 (13.4)                                        | 0.95                 |
| Diabetes without chronic complication | 1     | 23 (17.8)                                    | 43 (19.2)                                        | 0.75                 |
| Diabetes with chronic complication    | 2     | 15 (11.6)                                    | 21 (9.4)                                         | 0.50                 |
| Hemiplegia or paraplegia              | 2     | 20 (15.5)                                    | 32 (14.3)                                        | 0.76                 |
| Renal disease                         | 2     | 43 (33.3)                                    | 52 (23.2)                                        | <b>0.039</b>         |
| Any malignancy <sup>3</sup>           | 2     | 38 (29.5)                                    | 75 (33.5)                                        | 0.44                 |
| Moderate or severe liver disease      | 3     | 8 (6.2)                                      | 17 (7.6)                                         | 0.62                 |
| Metastatic solid tumor                | 3     | 18 (14.0)                                    | 47 (21.0)                                        | 0.10                 |
| AIDS/HIV                              | 6     | 1 (0.8)                                      | 1 (0.4)                                          | 1.00 <sup>4</sup>    |

<sup>1</sup> Data reported as n (%)

<sup>2</sup> In order to avoid the problem of multiple testing, p-values are compared to Bonferroni adjusted significant level  $0.05/17 = 0.0029$

<sup>3</sup> Including lymphoma and leukemia, except malignant neoplasm of skin

<sup>4</sup> Exact Fisher test

Supplementary Table S3 – Comparison of events involved in qSOFA and qPitt scores between therapy groups

| Item                   | 3GC definitive therapy <sup>1</sup> | Non-3GC definitive therapy <sup>1</sup> | p-value <sup>2</sup> |
|------------------------|-------------------------------------|-----------------------------------------|----------------------|
|                        | N=129                               | N=224                                   |                      |
| RR > 22/min            | 31 (28.2)                           | 27 (13.4)                               | 0.0013               |
| RR > 25/min            | 31 (28.2)                           | 26 (12.9)                               | 0.0008               |
| Altered mental status  | 44 (40.0)                           | 42 (20.8)                               | 0.0003               |
| Cardiac arrest         | 4 (3.1)                             | 7 (3.1)                                 | 1.00 <sup>3</sup>    |
| Systolic BP < 100 mmHg | 72 (55.8)                           | 122 (54.5)                              | 0.81                 |
| Systolic BP < 90 mmHg  | 52 (40.3)                           | 79 (35.3)                               | 0.35                 |
| Temperature < 36°C     | 55 (42.6)                           | 99 (44.2)                               | 0.78                 |

<sup>1</sup> Data reported as n (%)<sup>2</sup> In order to avoid the problem of multiple testing, p-values are compared to Bonferroni adjusted significant level 0.05/7 = 0.0071<sup>3</sup> Exact Fisher test

Supplementary Table S4 – Simple (HR/OR) and adjusted (aHR/aOR) estimates for secondary outcomes in regards to the principal analysis – 3GCs vs. non-3GCs for patients presenting BSIs due to any AmpC-E

| Outcomes                | Death (all-cause) within 90 days <sup>1</sup> |                      | Reinfection within 90 days <sup>1</sup> |                     | Readmission within 90 days <sup>1</sup> |             | In-hospital mortality <sup>2</sup> |                      |
|-------------------------|-----------------------------------------------|----------------------|-----------------------------------------|---------------------|-----------------------------------------|-------------|------------------------------------|----------------------|
|                         | HR (CI95%)                                    | aHR (CI95%)          | HR (CI95%)                              | aHR (CI95%)         | HR (CI95%)                              | aHR (CI95%) | OR (CI95%)                         | aOR (CI95%)          |
| 3CG vs. non-3CG therapy | 1.15<br>(0.76-1.76)                           | 0.97<br>(0.60-1.55)  | 2.10<br>(0.87-5.25)                     | 1.85<br>(0.74-4.60) | 0.87<br>(0.50-1.47)                     | -           | 1.96<br>(1.12-3.44)                | 1.58<br>(2.80-3.11)  |
| qPitt                   | 1.54<br>(1.28-1.84)*                          | 1.54<br>(1.28-1.85)* | 1.07<br>(0.64-1.80)                     | -                   | 0.98<br>(0.76-1.25)                     | -           | 2.25<br>(1.70-3.06)                | 2.20<br>(1.65-2.98)* |
| qSOFA                   | 1.78<br>(1.40-2.28)*                          | -                    | 1.60<br>(0.86-3.00)                     | -                   | 0.99<br>(0.73-1.33)                     | -           | 2.84<br>(1.97-4.20)                | -                    |
| ICU admission           | 2.28<br>(1.50-3.45)*                          | -                    | 2.55<br>(1.03-6.27)*                    | 2.27<br>(0.91-5.68) | 0.54<br>(0.28-1.10)                     | -           | 5.70<br>(3.18-10.47)               | -                    |

<sup>1</sup> Cox regression model applied<sup>2</sup> Logistic regression model applied

\* 95% level of significance

HR - Hazard Ratio ; aHR - adjusted Hazard Ratio ; OR-Odds Ratio ; aOR - adjusted Odds Ratio ; CI95%-95% Confidence Intervals

Supplementary Table S5 – Comparison of clinical outcomes between 3GC and cefepime/meropenem therapy groups for patients presenting BSIs due to any AmpC-E

| Outcome                                       | 3GC definitive therapy | Cefepime/meropenem definitive therapy | p-value <sup>1</sup> |
|-----------------------------------------------|------------------------|---------------------------------------|----------------------|
|                                               | N=129                  | N=37                                  |                      |
| OTF <sup>2</sup>                              | 60 (46.5)              | 18 (48.6)                             | 0.81                 |
| Survival for :                                |                        |                                       |                      |
| Death (all-cause) within 90 days <sup>3</sup> | 72.9                   | 70.3                                  | 0.92 <sup>a</sup>    |
| Reinfection within 90 days <sup>3</sup>       | 90.9                   | 91.2                                  | 0.96 <sup>b</sup>    |
| Readmission within 90 days <sup>3</sup>       | 79.3                   | 81.5                                  | 0.82 <sup>b</sup>    |
| Length of stay <sup>4</sup> (days)            | 38.0 (15.0;61.0)       | 52.0 (28.0;85.0)                      | 0.024                |
| In-hospital all-cause mortality <sup>2</sup>  | 30 (23.3)              | 9 (24.3)                              | 0.89 <sup>a</sup>    |

<sup>1</sup> Simple analysis results<sup>2</sup> Data reported as n (%) and tested using logistic regression<sup>3</sup> Data reported as 90-day survival probability (%) and tested using a simple Cox-regression model<sup>4</sup> Data reported as median (Q1;Q3) and non-parametric Kruskal-Wallis test<sup>a</sup> Significant association with qPitt score in multiple analysis, the adjusted model did not alter the conclusion<sup>b</sup> No association with severity scores in multiple analysis

Supplementary Table S6 – Simple (HR/OR) and adjusted (aHR/aOR) estimates for secondary outcomes in regards to the 1<sup>st</sup> subgroup analysis – 3GCs vs. cefepime/meropenem for patients presenting BSIs due to any AmpC-E

| Outcomes                | Death (all-cause) within 90 days <sup>1</sup> |                      | Reinfection within 90 days <sup>1</sup> |                      | Readmission within 90 days <sup>1</sup> |                     | In-hospital mortality <sup>2</sup> |                      |
|-------------------------|-----------------------------------------------|----------------------|-----------------------------------------|----------------------|-----------------------------------------|---------------------|------------------------------------|----------------------|
| Covariates              | HR (CI95%)                                    | aHR (CI95%)          | HR (CI95%)                              | aHR (CI95%)          | HR (CI95%)                              | aHR (CI95%)         | OR (CI95%)                         | aOR (CI95%)          |
| 3CG vs. non-3CG therapy | 0.97<br>(0.50-1.90)                           | 0.92<br>(0.44-1.91)  | 1.03<br>(0.28-3.73)                     | 2.30<br>(0.28-19.02) | 1.12<br>(0.42-2.97)                     | 1.03<br>(0.39-2.78) | 0.94<br>(0.41-2.31)                | 0.83<br>(0.32-2.33)  |
| qPitt                   | 1.46<br>(1.13-1.88)*                          | 1.46<br>(1.13-1.89)* | 0.93<br>(0.500-1.73)                    | 1.35<br>(0.64-2.86)  | 1.04<br>(0.73-1.47)                     | -                   | 1.84<br>(1.30-2.70)*               | 1.83<br>(1.29-2.69)* |
| qSOFA                   | 1.53<br>(1.08-2.16)*                          | -                    | 1.28<br>(0.60-2.72)                     | -                    | 0.91<br>(0.58-1.43)                     | -                   | 2.08<br>(1.34-3.35)*               | -                    |
| ICU admission           | 1.91<br>(1.07-3.42)*                          | -                    | 1.84<br>(0.62-5.45)                     | -                    | 0.60<br>(0.25-1.45)                     | 0.61<br>(0.25-1.47) | 2.93<br>(1.41-6.33)*               | -                    |

<sup>1</sup> Cox regression model applied

<sup>2</sup> Logistic regression model applied

\* 95% level of significance

HR - Hazard Ratio ; aHR - adjusted Hazard Ratio ; OR-Odds Ratio ; aOR - adjusted Odds Ratio ; CI95%-95% Confidence Intervals

Supplementary Table S7 – Comparison of clinical outcomes between 3GC and non-3GC therapy groups for patients presenting BSIs due to the *E. cloacae* complex, *K. aerogenes* and *C. freundii*.

| Outcome                                       | 3GC definitive therapy<br>N=65 | Non-3GC definitive therapy<br>N=141 | p-value <sup>4</sup> |
|-----------------------------------------------|--------------------------------|-------------------------------------|----------------------|
| OTF <sup>3</sup>                              | 28 (43.1)                      | 52 (36.9)                           | 0.37                 |
| Survival for :                                |                                |                                     |                      |
| Death (all-cause) within 90 days <sup>1</sup> | 78.7                           | 78.5                                | 0.77 <sup>a</sup>    |
| Reinfection within 90 days <sup>1</sup>       | 98.4                           | 90.8                                | 0.028 <sup>b</sup>   |
| Readmission within 90 days <sup>1</sup>       | 80.0                           | 75.3                                | 0.38 <sup>a</sup>    |
| Length of stay <sup>2</sup> (days)            | 30.0 (13.0;70.0)               | 20.0 (11.0;35.0)                    | 0.001                |
| In-hospital all-cause mortality <sup>3</sup>  | 13 (20.0)                      | 14 (9.9)                            | 0.051 <sup>a</sup>   |

<sup>1</sup> Data reported as 90-day survival probability (%) and tested using a simple Cox-regression model

<sup>2</sup> Data reported as median (Q1;Q3) and non-parametric Kruskal-Wallis test

<sup>3</sup> Data reported as n (%) and tested using logistic regression

<sup>4</sup> Simple analysis results

<sup>a</sup> Significant association with qSOFA score in multiple analysis, the adjusted model did not alter the conclusion

<sup>b</sup> No association with severity scores in multiple analysis

Supplementary Table S8 – Simple (HR/OR) and adjusted (aHR/aOR) estimates for secondary outcomes in regards to the 2<sup>nd</sup> subgroup analysis – 3GCs vs. non-3GCs for patients presenting BSIs due to the *E. cloacae* complex, *K. aerogenes* and *C. freundii*.

| Outcomes                | Death (all-cause) within 90 days <sup>1</sup> |                      | Reinfection within 90 days <sup>1</sup> |                      | Readmission within 90 days <sup>1</sup> |                      | In-hospital mortality <sup>2</sup> |                      |
|-------------------------|-----------------------------------------------|----------------------|-----------------------------------------|----------------------|-----------------------------------------|----------------------|------------------------------------|----------------------|
| Covariates              | HR (CI95%)                                    | aHR (CI95%)          | HR (CI95%)                              | aHR (CI95%)          | HR (CI95%)                              | aHR (CI95%)          | OR (CI95%)                         | aOR (CI95%)          |
| 3CG vs. non-3CG therapy | 1.10<br>(0.58-2.07)                           | 0.75<br>(0.35-1.62)  | 6.28<br>(1.22-32.41)*                   | 3.32<br>(0.54-20.39) | 0.73<br>(0.36-1.49)                     | 0.77<br>(0.36-1.64)  | 2.27<br>(0.98-5.18)                | 1.66<br>(0.58-4.62)  |
| qPitt                   | 1.28<br>(0.97-1.68)                           | -                    | 1.17<br>(0.55-2.45)                     | -                    | 1.09<br>(0.83-1.42)                     | -                    | 1.81<br>(1.20-2.80)*               | -                    |
| qSOFA                   | 1.62<br>(1.11-2.36)*                          | 1.65<br>(1.13-2.42)* | 1.97<br>(0.73-5.34)                     | 1.78<br>(0.61-5.19)  | 1.22<br>(0.85-1.76)                     | 1.53<br>(1.02-2.77)* | 2.50<br>(1.40-4.66)*               | 2.40<br>(1.32-4.52)* |
| ICU admission           | 1.82<br>(0.99-3.35)                           | -                    | 1.23<br>(0.24-6.33)                     | -                    | 0.52<br>(0.22-1.23)                     | 0.33<br>(0.11-1.02)  | 4.60<br>(2.00-10.92)*              | -                    |

<sup>1</sup> Cox regression model applied

<sup>2</sup> Logistic regression model applied

\* 95% level of significance

HR - Hazard Ratio ; aHR - adjusted Hazard Ratio ; OR-Odds Ratio ; aOR - adjusted Odds Ratio ; CI95%-95% Confidence Intervals
